# Supplementary material for: DNA Methylation signatures underpinning blood neutrophil to lymphocyte ratio during first week of human life
Source: PubMed Central journal article supplement — Nat Commun. 2024 Sep 17;15:8167. doi: 10.1038/s41467-024-52283-9 (PMC11408723; doi:10.1038/s41467-024-52283-9), 2024-09-17
Supplement: 41467_2024_52283_MOESM1_ESM.pdf [file 41467_2024_52283_MOESM1_ESM.pdf]

# DNA Methylation Signatures Underpinning Blood Neutrophil to Lymphocyte Ratio During First Week of Human Life

## Supplementary Figures

David Martino <sup>1,2\*</sup>, Nina Kresoje <sup>1</sup>, Nelly Amenyogbe <sup>1,3</sup>, Rym Ben-Othman <sup>1,17</sup>, Bing Cai <sup>4</sup>, Mandy Lo <sup>4</sup>, Olubukola Idoko <sup>5</sup>, Oludare A. Odumade <sup>6,7</sup>, Reza Falsafi <sup>8</sup>, Travis M. Blimkie <sup>8</sup>, Andy An <sup>8</sup>, Casey P. Shannon <sup>9,10</sup>, Sebastiano Montante <sup>11</sup>, Bhavjinder K. Dhillon <sup>8</sup>, Joann Diray-Arce <sup>6,7</sup>, Al Ozonoff <sup>6,7,12</sup>, Kinga K. Smolen <sup>6,7</sup>, Ryan R. Brinkman <sup>11</sup>, Kerry McEnaney <sup>6</sup>, Asimena Angelidou <sup>6,7,14</sup>, Peter Richmond <sup>1,2</sup>, Scott J. Tebbutt <sup>9,10,13</sup>, the EPIC-HIPC consortium †, Beate Kampmann <sup>5,15</sup>, Ofer Levy <sup>6,7,12</sup>, Robert E. W. Hancock <sup>8</sup>, Amy H.Y. Lee <sup>16</sup>, and Tobias R. Kollmann <sup>1,3</sup>.

- 1 *Telethon Kids Institute, 15 Hospital Avenue Nedlands, Perth 6009, WA, Australia.*
- 2 *University of Western Australia, 35 Stirling Highway, Crawley, WA 6009*
- 3 *Department of Microbiology & Immunology, Dalhousie University, 5850 College Street, Halifax, Nova Scotia, Canada*
- 4 *BC Children's Hospital, University of British Columbia, Rm 2D19, 4480 Oak Street, Vancouver, BC, V6H 3V4, Canada*
- 5 *Vaccines & Immunity Theme, Medical Research Council Unit The Gambia at the London School of Hygiene and Tropical Medicine, Atlantic Boulevard, P.O. Box 273, Banjul, Gambia*
- 6 *Precision Vaccines Program, Department of Pediatrics, Boston Children's Hospital, 4 Blackfan Circle, HIM 8, Boston, MA, 02115, USA*
- 7 *Harvard Medical School, 25 Shattuck Street, Boston, MA, 02115, USA*
- 8 *Department of Microbiology & Immunology, University of British Columbia, 1365-2350 Health Sciences Mall, Vancouver, BC, V6T 1Z3, Canada*
- 9 *PROOF Centre of Excellence, Providence Research, Vancouver, 10th Floor, 1190 Hornby Street, Vancouver, BC, V6Z 2K5, Canada*
- 10 *UBC Centre for Heart Lung Innovation, St. Paul's Hospital, 1081 Burrard Street, Vancouver, BC V6Z 1Y6, Canada.*
- 11 *BC Cancer Agency, 686 West Broadway, Suite 500 Vancouver, BC, V5Z 1G1, Canada.*
- 12 *Broad Institute of MIT and Harvard, 415 Main St, Cambridge, MA, 02142, USA.*
- 13 *Division of Respiratory Medicine, Department of Medicine, University of British Columbia, 2211 Wesbrook Mall, Vancouver BC V6T 2B5, Canada*
- 14 *Department of Neonatology, Beth Israel Deaconess Medical Centre, 330 Brookline Ave, Boston, MA 02215, USA.*
- 15 *Centre for Global Health and Institute for International Health, Charite Universitätsmedizin, Germany*
- 16 *Molecular Biology & Biochemistry, Simon Fraser University, 8888 University Drive, Burnaby, B.C, V5A1S6*

\* Corresponding author: [david.martino@telethonkids.org.au](mailto:david.martino@telethonkids.org.au)

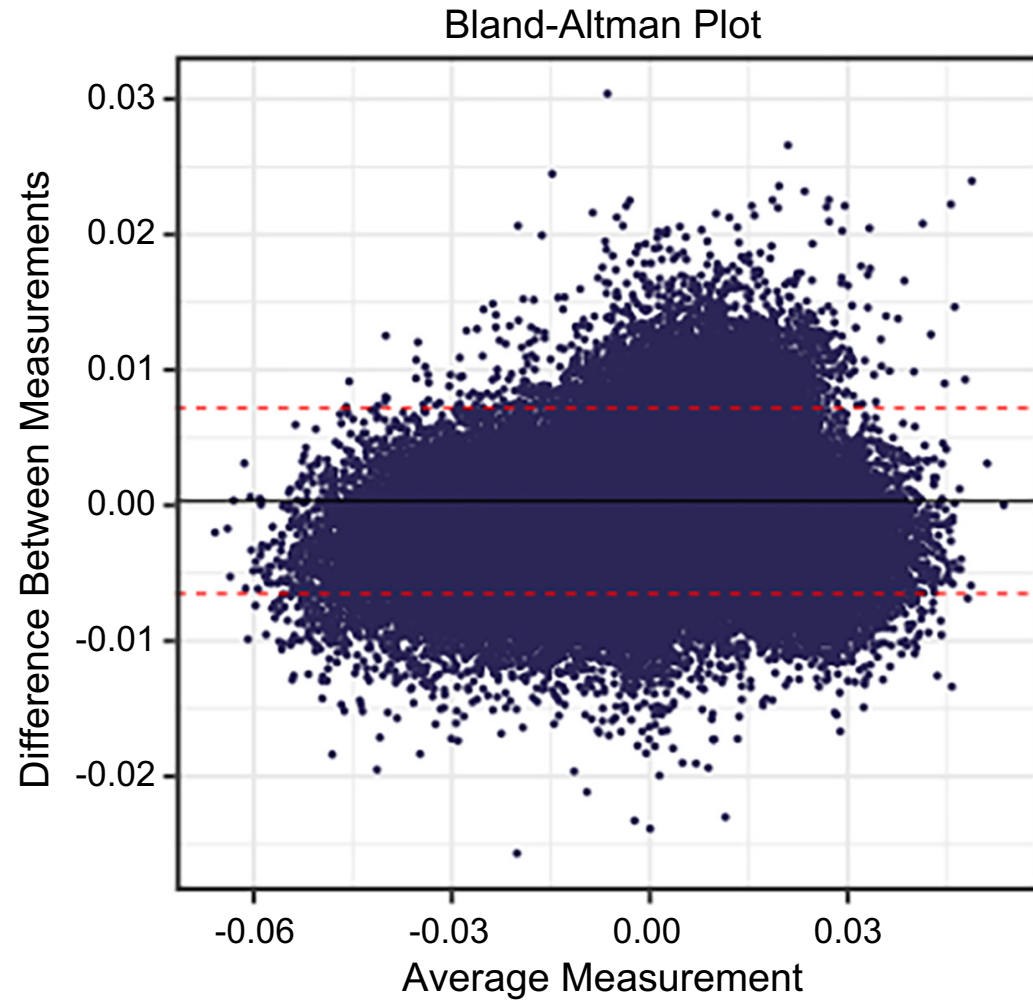

**Supplementary Figure 1 – Bland-Altman analysis of agreement between main cohort and replication cohort.** Beta values for DOL-associated CpG were modelled using DOL as the predictor, adjusted for sex and sample plate. The same model was fitted to both the main cohort and the replication cohort. Difference in model logFC estimates are plotted on the y-axis and the average between the logFC estimates on the x-axis. The mean difference is shown as the solid line and 95% confidence intervals are shown as dashed red lines.

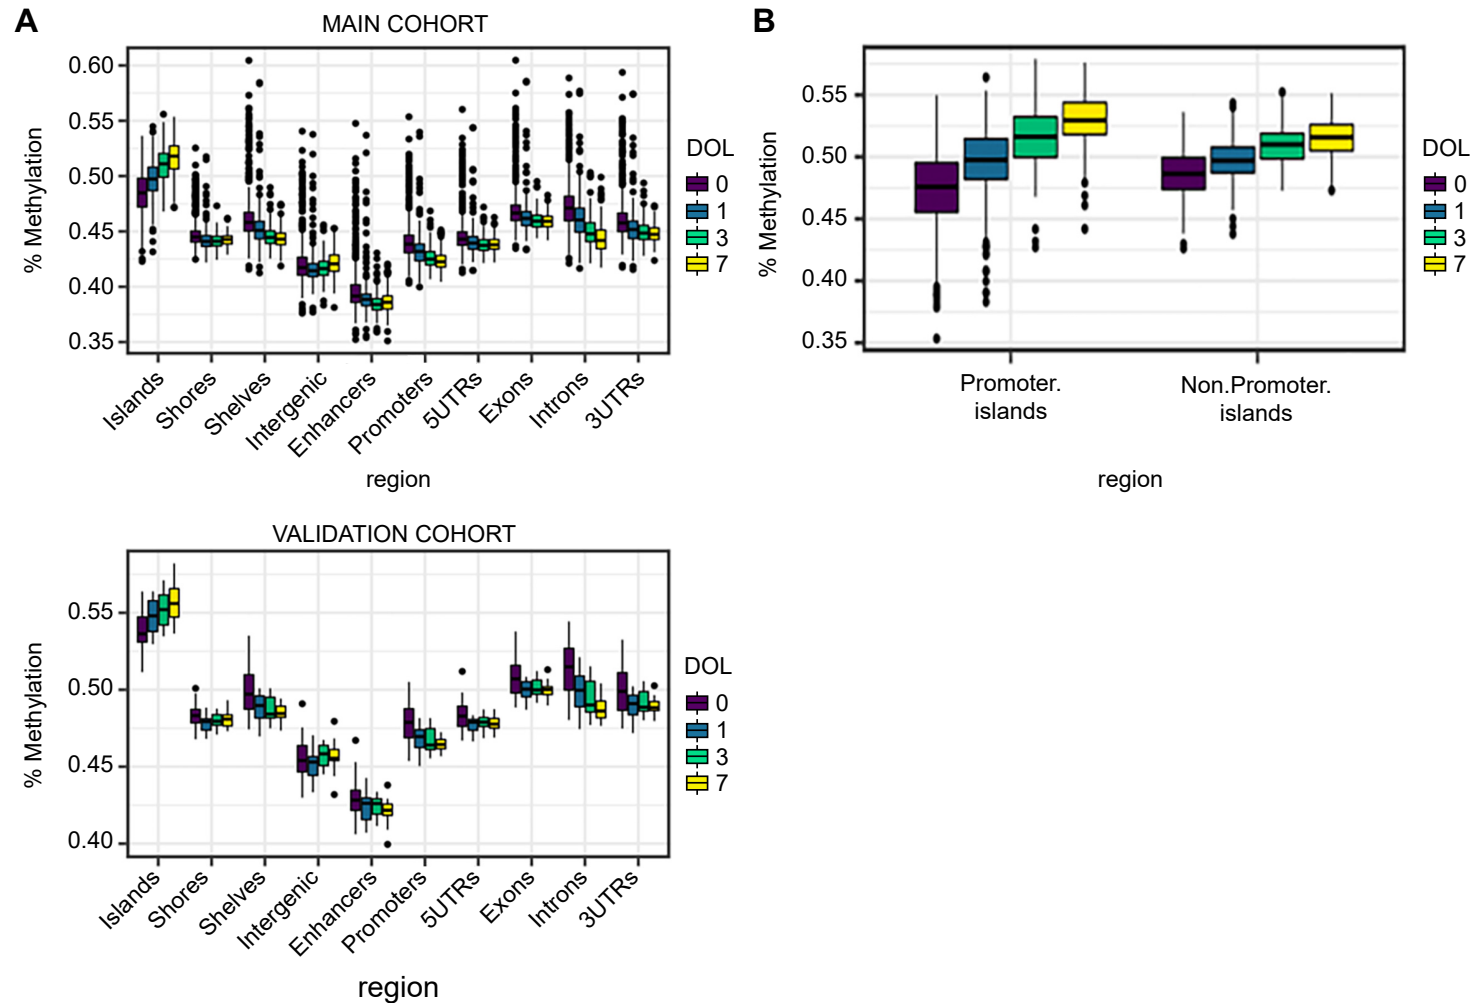

**Supplementary Figure 2 – Median methylation change per DOL in different genomic regions. (A)** Methylation ratios expressed as percentage (y-axis) for DOL associated CpGs stratified by genomic feature (x-axis). UTR = untranslated region. **(B)** DOL associated changes in CpG islands stratified by promoter associated and non-promoter associated CpG islands. Boxplots show the median and interquartile range (IQR, 25th-75th percentile). Whiskers extend to the most extreme data points within 1.5 times the IQR from the box hinges (the 25th and 75th percentiles). Points outside this range are considered outliers and are plotted individually). Total n=1267 (main cohort), n=86 (validation cohort).

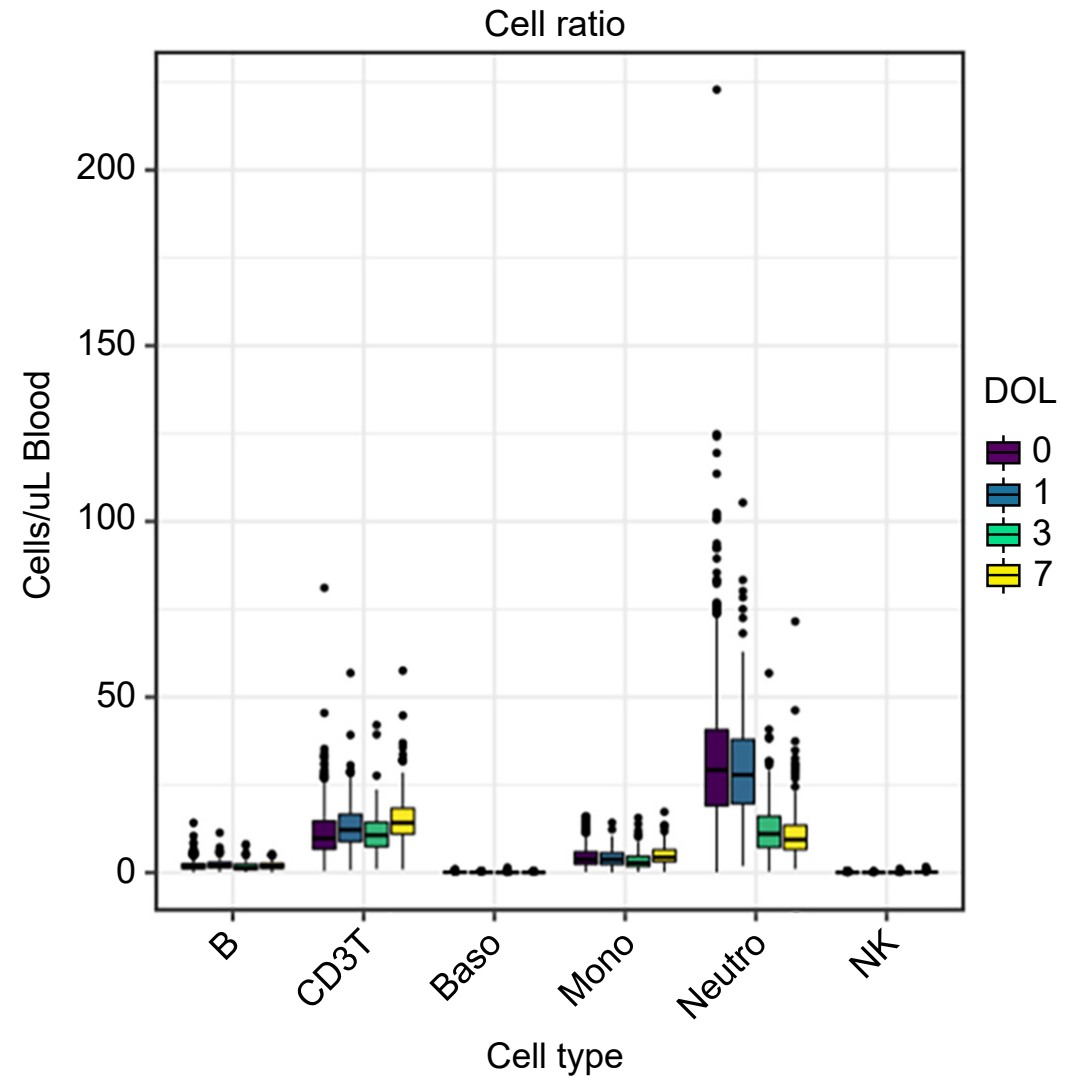

**Supplementary Figure 3 – Flow cytometric analysis of cell ratios stratified by Day of Life.** Boxplots show the median and interquartile range (IQR, 25th-75th percentile). Whiskers extend to the most extreme data points within 1.5 times the IQR from the box hinges (the 25th and 75th percentiles). Points outside this range are considered outliers and are plotted individually). Total n=1256 samples.

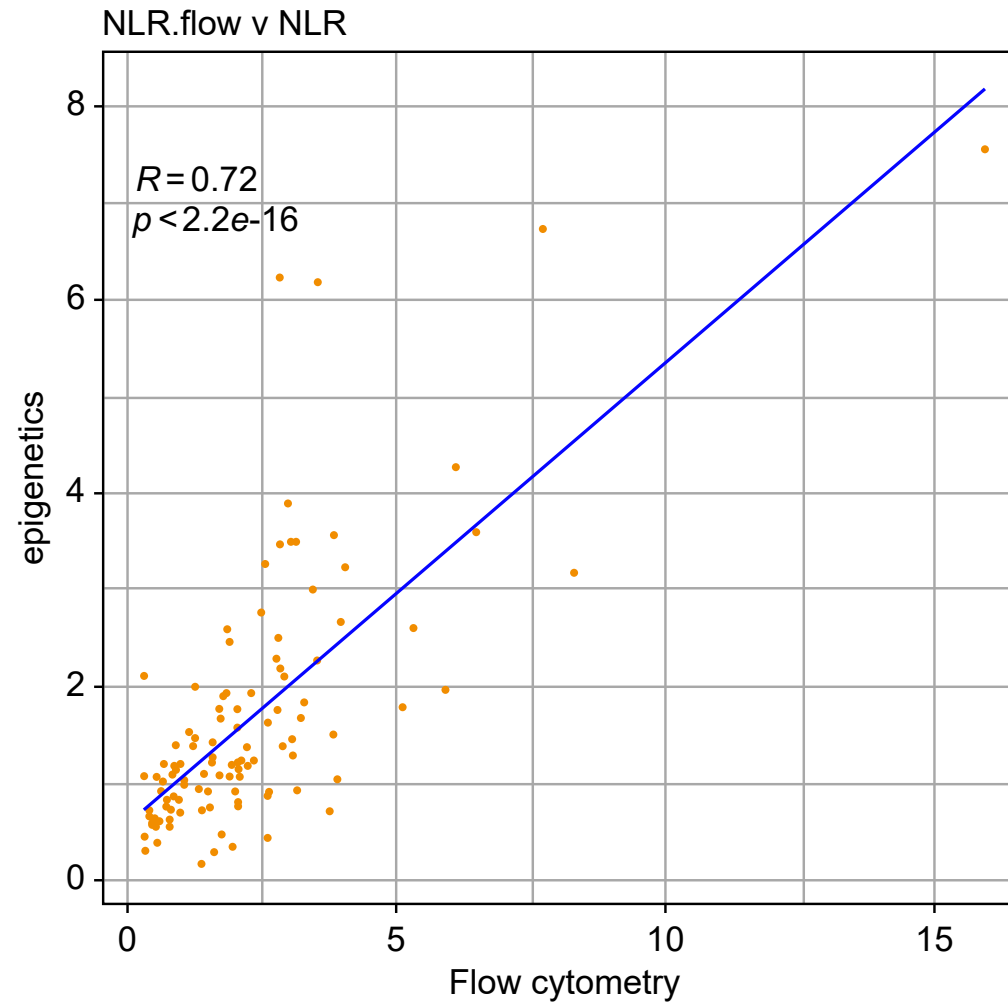

**Supplementary Figure 4 – Pearson's' Correlation between Flow cytometry derived NLR and epigenetically inferred NLR.** Each point represents a subjects NLR score from the sepsis sub-cohort. Each point is an individual observation. The solid line indicates the linear regression fit for DOL. Two-sided  $P$  value for the Pearson's correlation coefficient ( $R$ ) is shown. Total  $n=54$ .

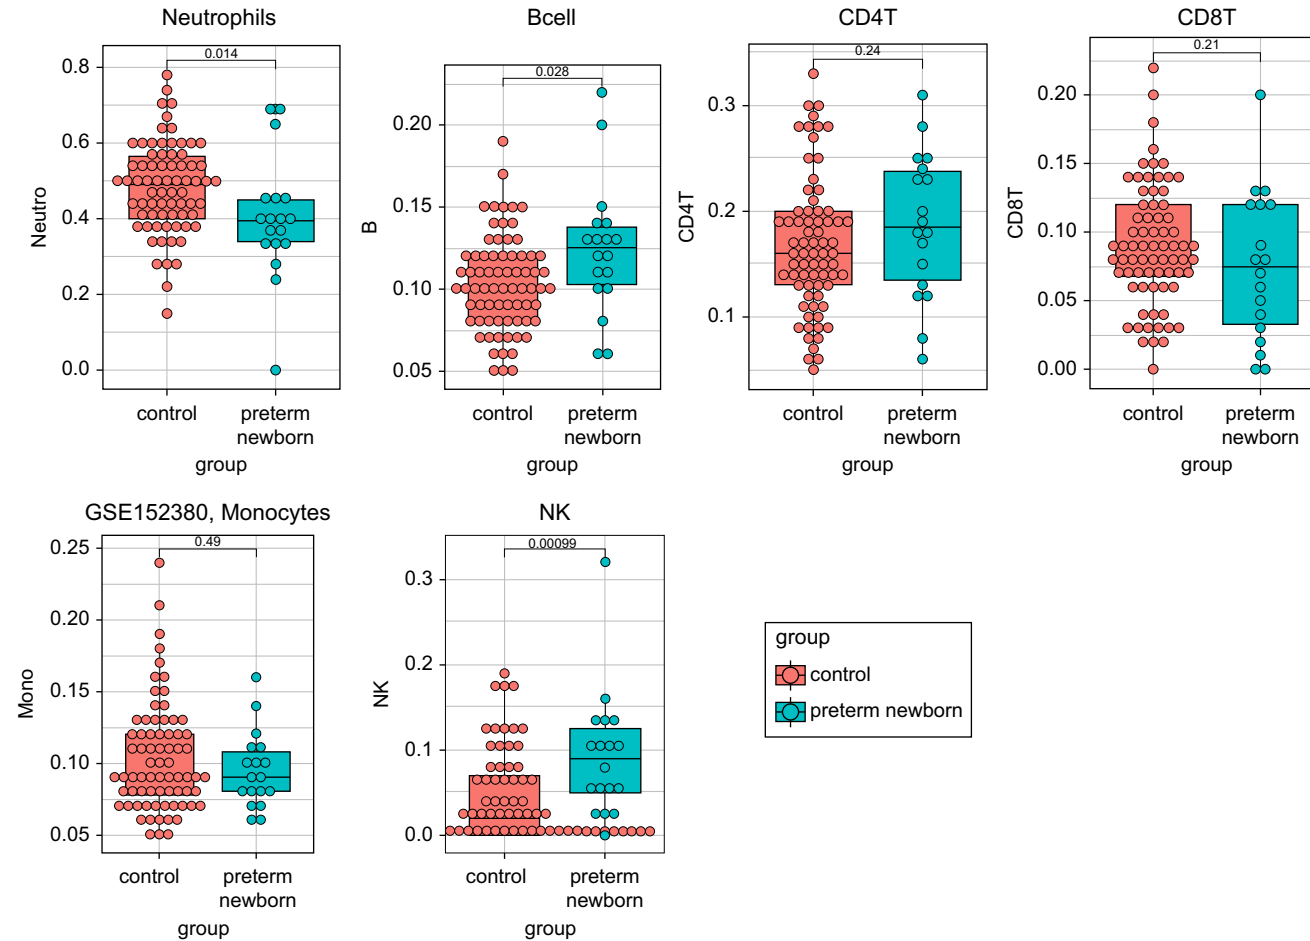

**Supplementary Figure 5 – Inferred cell counts from GSE152380.** Umbilical cord whole blood methylation array data were downloaded and cell counts estimated using the EpiDish package. Boxplots show the median and interquartile range (IQR, 25th-75th percentile). Whiskers extend to the most extreme data points within 1.5 times the IQR from the box hinges (the 25th and 75th percentiles). Points outside this range are considered outliers and are plotted individually). *P*-values are one-Wilcoxon Rank-Sum Test. Total n=90.

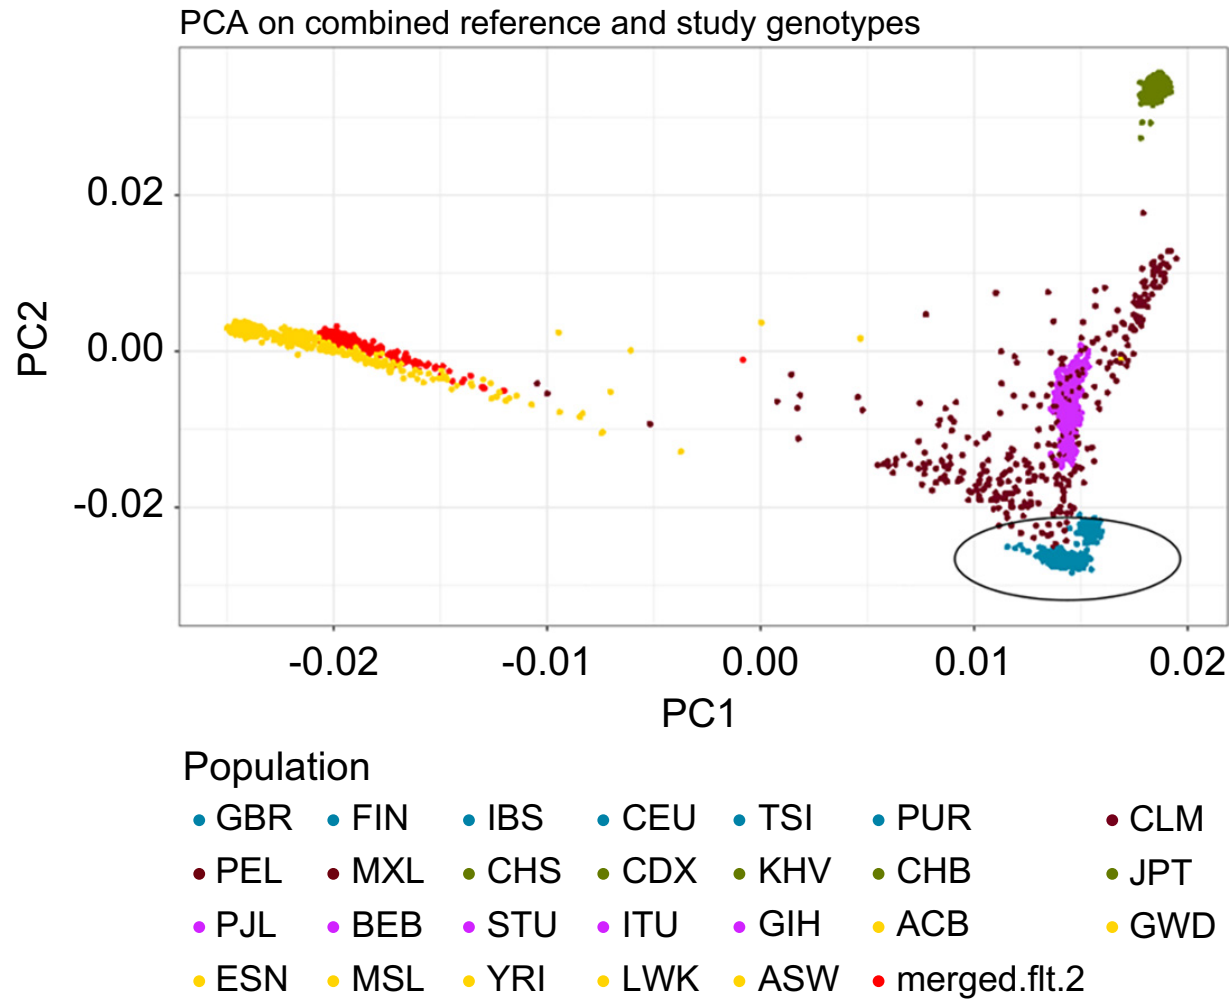

**Supplementary Figure 6 – Principal component analysis of genetically inferred ancestry.** Study population samples were merged with 1000 Genomes reference populations and PCA analysis performed. Study samples are shown in red. The African super-cluster is shown in yellow. Ellipse denotes the European population.

# DNA Methylation Signatures Underpinning Blood Neutrophil to Lymphocyte Ratio During First Week of Human Life

David Martino <sup>1,2\*</sup>, Nina Kresoje <sup>1</sup>, Nelly Amenyogbe <sup>1,3</sup>, Rym Ben-Othman <sup>1,17</sup>, Bing Cai <sup>4</sup>, Mandy Lo <sup>4</sup>, Olubukola Idoko <sup>5</sup>, Oludare A. Odumade <sup>6,7</sup>, Reza Falsafi <sup>8</sup>, Travis M. Blimkie <sup>8</sup>, Andy An <sup>8</sup>, Casey P. Shannon <sup>9,10</sup>, Sebastiano Montante <sup>11</sup>, Bhavjinder K. Dhillon <sup>8</sup>, Joann Diray-Arce <sup>6,7</sup>, Al Ozonoff <sup>6,7,12</sup>, Kinga K. Smolen <sup>6,7</sup>, Ryan R. Brinkman <sup>11</sup>, Kerry McEnaney <sup>6</sup>, Asimena Angelidou <sup>6,7,14</sup>, Peter Richmond <sup>1,2</sup>, Scott J. Tebbutt <sup>9,10,13</sup>, the EPIC-HIPC consortium †, Beate Kampmann <sup>5,15</sup>, Ofer Levy <sup>6,7,12</sup>, Robert E. W. Hancock <sup>8</sup>, Amy H.Y. Lee <sup>16</sup>, and Tobias R. Kollmann <sup>1,3</sup>.

- 1 *Telethon Kids Institute, 15 Hospital Avenue Nedlands, Perth 6009, WA, Australia.*
- 2 *University of Western Australia, 35 Stirling Highway, Crawley, WA 6009*
- 3 *Department of Microbiology & Immunology, Dalhousie University, 5850 College Street, Halifax, Nova Scotia, Canada*
- 4 *BC Children's Hospital, University of British Columbia, Rm 2D19, 4480 Oak Street, Vancouver, BC, V6H 3V4, Canada*
- 5 *Vaccines & Immunity Theme, Medical Research Council Unit The Gambia at the London School of Hygiene and Tropical Medicine, Atlantic Boulevard, P.O. Box 273, Banjul, Gambia*
- 6 *Precision Vaccines Program, Department of Pediatrics, Boston Children's Hospital, 4 Blackfan Circle, HIM 8, Boston, MA, 02115, USA*
- 7 *Harvard Medical School, 25 Shattuck Street, Boston, MA, 02115, USA*
- 8 *Department of Microbiology & Immunology, University of British Columbia, 1365-2350 Health Sciences Mall, Vancouver, BC, V6T 1Z3, Canada*
- 9 *PROOF Centre of Excellence, Providence Research, Vancouver, 10th Floor, 1190 Hornby Street, Vancouver, BC, V6Z 2K5, Canada*
- 10 *UBC Centre for Heart Lung Innovation, St. Paul's Hospital, 1081 Burrard Street, Vancouver, BC V6Z 1Y6, Canada.*
- 11 *BC Cancer Agency, 686 West Broadway, Suite 500 Vancouver, BC, V5Z 1G1, Canada.*
- 12 *Broad Institute of MIT and Harvard, 415 Main St, Cambridge, MA, 02142, USA.*
- 13 *Division of Respiratory Medicine, Department of Medicine, University of British Columbia, 2211 Wesbrook Mall, Vancouver BC V6T 2B5, Canada*
- 14 *Department of Neonatology, Beth Israel Deaconess Medical Centre, 330 Brookline Ave, Boston, MA 02215, USA.*
- 15 *Centre for Global Health and Institute for International Health, Charite Universitätsmedizin, Germany*
- 16 *Molecular Biology & Biochemistry, Simon Fraser University, 8888 University Drive, Burnaby, B.C, V5A1S6*

\* Corresponding author: [david.martino@telethonkids.org.au](mailto:david.martino@telethonkids.org.au)



## Supplementary Methods: Flow Cytometry Gating Strategy

Flow cytometry sample acquisition and data analysis were performed by the EPIC-HIPC flow cytometry core and detailed methods are provided in <sup>1</sup>. An overview of flow cytometry methods are provided below.

### Sample Processing and Acquisition

Newborns were sampled twice within the first week of life, collecting 2 ml of peripheral blood at birth (DOL0) and at either DOL1, 3, or 7. Briefly, 225 µl of whole blood cells were mixed with culture medium, stained with a fixable viability dye, and fixed prior to storage. Thawed samples were stained with two flow cytometry panels designed to identify adaptive and innate cell populations. Stained cells were washed, resuspended, and acquired on an LSRII flow cytometer.

### Quality Control and Automated Gating

Initial quality control involved visual inspection of compensated data using FlowJo software to ensure optimal experimental conditions and identify major populations. Five QC steps were performed:

- **Sample quality:** Samples were visually inspected at thawing and after centrifugation. Samples with incomplete red blood cell lysis or poorly resuspended cell pellets were flagged or excluded.
- **Cytometer performance:** CS&T beads were used to assess instrument performance.
- **Laser stability:** Rainbow beads were used to monitor and adjust for laser fluctuations.
- **Treatment group randomization:** Samples were randomized across plates using a block randomization scheme.
- **Batch effects:** A biological internal control was run in parallel with study samples to assess stability across batches.

An automated pipeline was used for gating and further quality control to reduce subjectivity and time. Data was compensated, transformed, and poor-quality events were removed using flowCut. flowDensity performed automated cell population identification based on predefined gating strategies for each panel (33 populations for Innate, 23 for Adaptive). Samples were excluded based on:

- Insufficient cell numbers for complete gating
- Unusual cell distributions affecting population identification

- Low cell counts in the "Size" gate (threshold: mean - 3\*SD)
- Low live cell numbers (threshold: mean - 3\*SD)
- Sex mismatch in metadata

### Data Analysis

flowTypeFilter generated all possible marker combinations (immunophenotypes) based on flowDensity thresholds. To reduce false positives, populations with low cell counts were excluded (<10 cells/ul for Adaptive, <20 cells/ul for Innate). Cell counts were normalized using counting beads and the remaining data was analyzed using RchyOptimyx.

**Note:** The detailed descriptions of flowCut<sup>2</sup>, flowDensity<sup>3</sup>, flowTypeFilter<sup>4</sup>, and RchyOptimyx<sup>5</sup> algorithms and their implementation can be found in the respective publications.

### References

- 1 Montante, S. *et al.* Breastfeeding and Neonatal Age Influence Neutrophil-Driven Ontogeny of Blood Cell Populations in the First Week of Human Life. *J Immunol Res* **2024**, 1117796, doi:10.1155/2024/1117796 (2024).
- 2 Meskas, J., Yokosawa, D., Wang, S., Segat, G. C. & Brinkman, R. R. flowCut: An R package for automated removal of outlier events and flagging of files based on time versus fluorescence analysis. *Cytometry A* **103**, 71-81, doi:10.1002/cyto.a.24670 (2023).
- 3 Eskandari, G. *et al.* Implementing flowDensity for Automated Analysis of Bone Marrow Lymphocyte Population. *J Pathol Inform* **12**, 49, doi:10.4103/JOPI.JOPI\_12\_21 (2021).
- 4 flowTypeFilter v. 1 (2023). [eve-chen97/flowTypeFilter: Phenotyping Flow Cytometry Assays \(github.com\)](https://github.com/eve-chen97/flowTypeFilter: Phenotyping Flow Cytometry Assays)
- 5 O'Neill, K., Jalali, A., Aghaeepour, N., Hoos, H. & Brinkman, R. R. Enhanced flowType/RchyOptimyx: a BioConductor pipeline for discovery in high-dimensional cytometry data. *Bioinformatics* **30**, 1329-1330, doi:10.1093/bioinformatics/btt770 (2014).

# Flow cytometry gating strategy, adaptive immune cell panel

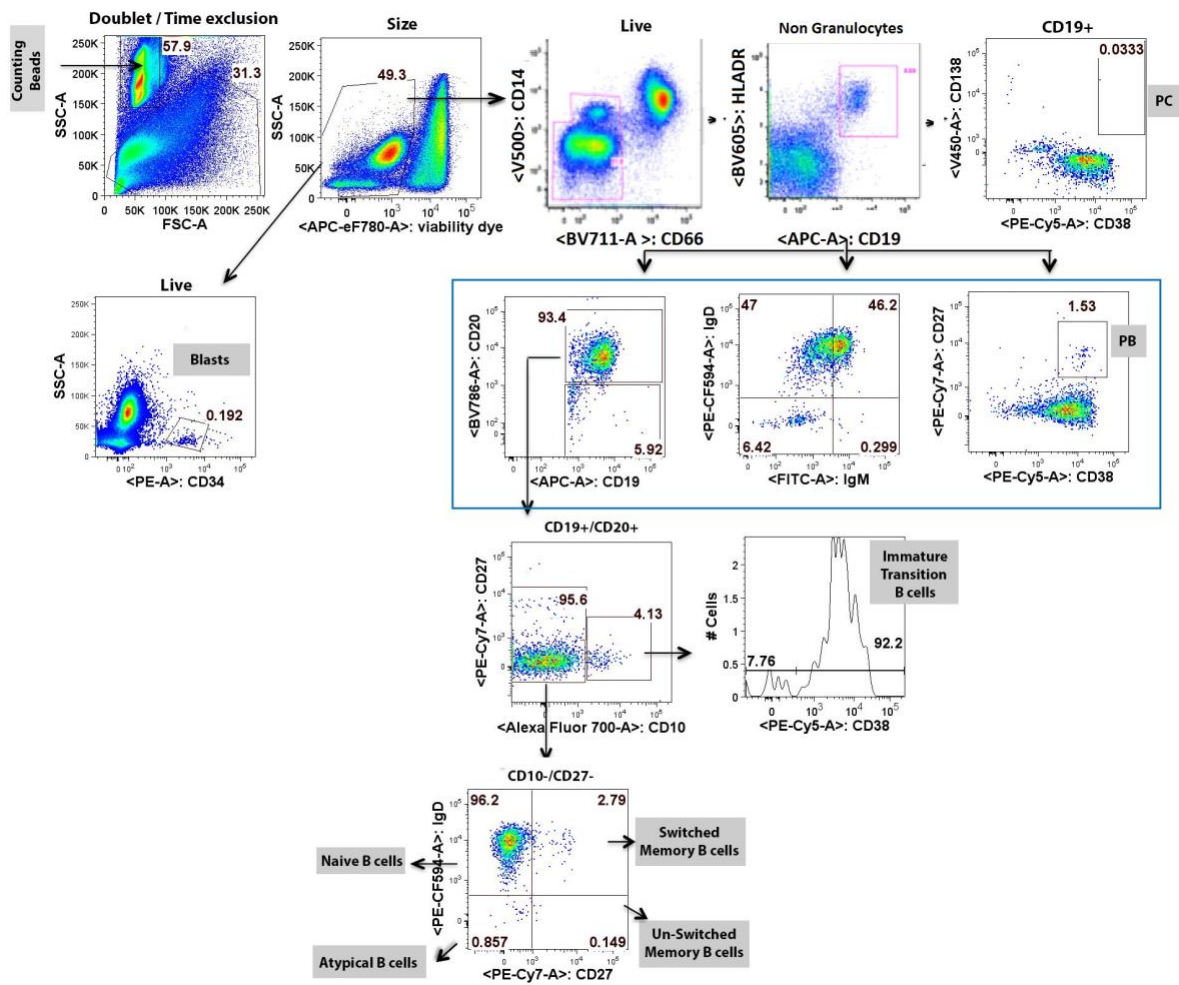

# Flow cytometry gating strategy, innate panel

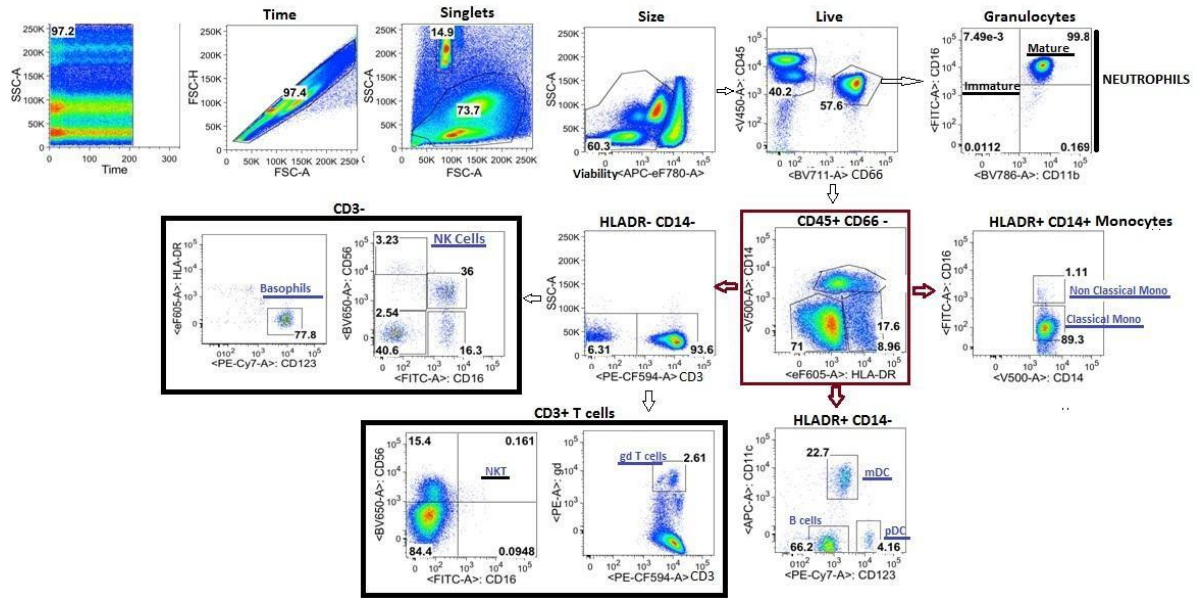

## **Supplementary Note 1: EPIC-HIPC Consortium members by affiliation**

### **Telethon Kids Institute, 15 Hospital Avenue Nedlands, Perth 6009, WA, Australia.**

David Martino, Nelly Amenyogbe, Rym Ben-Othman, Peter C. Richmond, Tobias R Kollmann & Anita H. J. van den Biggelaar

### **Division of Pediatrics, School of Medicine, University of Western Australia, 35 Stirling Highway, Crawley, WA 6009, Australia.**

David Martino, Peter C. Richmond

### **Department of Microbiology and Immunology; Pediatrics; Dalhousie University, 1344 Summer St Halifax, NS B3H 0A8 Canada**

Nelly Amenyogbe & Tobias R Kollman

### **Department of Pediatrics, University of British Columbia, and BC Children's Hospital, 4480 Oak Street, Vancouver, BC V6H 3V4, Canada.**

Bing Cai, Winnie Bao, Joe Huang & Natallia Varankovich

### **Vaccines and Immunity Theme, Medical Research Council Unit, The Gambia at the London School of Hygiene and Tropical Medicine, Atlantic Boulevard, P.O. Box 273, Banjul, The Gambia.**

Olubukola T. Idoko, Beate Kampmann, Momoudou Cox, Alansana Darboe, Tida Dibasse, Abdulazeez Imam, Jorjoh Ndure, Jainaba Njie-Jobe, Elishia Roberts, Julia Strandmark & Oghenebrume Wariri,

### **Precision Vaccines Program, Boston Children's Hospital, 4 Blackfan Circle Boston, MA 02115, USA.**

Oludare A. Odumade, Joann Diray-Arce, Al Ozonoff, Kinga K. Smolen, Kerry McEnaney, Annmarie Hoch, Asimonia Angelidou, Ofer Levy, Tue B. Bennike, Kendyll Burnell, Jing Chen, Mitchell Cooney, Benoit Fatou, Simon D van Haren, Ken Kraft, Mark Liu, Caitlyn McLoughlin, Elena Morrocchi, Athena Nguyen, Jensen Pak, Alec Plotkin, Shun Rao, Guzman Sanchez-Schmitz, Hanno Steen, Caitlin Syphurs, Diana Vo, & Sofia Vignolo

### **Department of Microbiology and Immunology, University of British Columbia, 1365-2350 Health Sciences Mall, Vancouver, BC V6T 1Z3, Canada.**

Reza Falsafi, Travis M. Blimkie, Bhavjinder K. Dhillon, Robert E.W. Hancock, Amy H. Lee, Samuel H. Hinshaw & Maren Smith

### **PROOF Centre of Excellence, British Columbia, 10th floor, 1190 Hornby Street, Vancouver, BC V6Z 2K5, Canada.**

Casey P Shannon, Scott J Tebbutt, Abhinav Checkervarty, Virginia Chen, & Daniel He

### **BC Centre for Heart Lung Innovation, St. Paul's Hospital, 1081 Burrard Street, Vancouver, BC V6Z 1Y6, Canada.**

Casey P Shannon, Scott J Tebbutt, Abhinav Checkervarty, Virginia Chen, & Daniel He

### **BC Cancer Agency, 675 West 10th Avenue, Vancouver, BC V5Z 1G1, Canada.**

Sebastiano Montante, Ryan R. Brinkman & Mehrnoush Malek

### **Broad Institute of MIT and Harvard, Merkin Building, 415 Main St, Cambridge, MA 02142, USA.**

Al Ozonoff

**Department of Medicine, Division of Respiratory Medicine, University of British Columbia, 2775 Laurel Street, Vancouver, BC V5Z 1M9, Canada.**  
Scott J Tebbutt

**Centre for Global Health and Institute for International health, Charite Universitatsmedizin, Augustenburger Platz 1, 13353, Berlin, Germany**  
Beate Kampmann

**Department of Pediatrics, Harvard Medical School, 25 Shattuck Street, Boston, MA 02115, USA**  
Oludare A. Odumade Joann Diray-Arce, Al Ozonoff, Kinga K. Smolen, Asimenia Angelidou, Ofer Levy, Tue B. Bennike, & Mitchell Cooney, Simon D van Haren, Jensen Pak, Alec Plotkin, & Guzman Sanchez-Schmitz

**Papua New Guinea Institute of Medical Research, Homate Street, 441 Goroka, Eastern Highlands Province, Papua New Guinea.**  
William S. Pomat, Rebecca Ford, Geraldine Masiria, Wendy Kirarock, John Paul Matlam & Gerard Saleu

**Department of Neonatology, Beth Israel Deaconess Medical Center, 330 Brookline Ave, Boston, MA, 02215, USA.**  
Asimenia Angelidou

**Institute for Medical Immunology, Université libre de Bruxelles, Charleroi, Rue Adrienne Bolland 8, 6041 Gosselies, Belgium.**  
Arnaud Marchant

**Faculty of Infectious and Tropical Diseases, London School of Hygiene and Tropical Medicine, Keppel Street, London WC1E 7HT, UK**  
Olubukola T. Idoko & Edward P. K. Parker

**Department of Molecular Biology & Biochemistry, Simon Fraser University, South Sciences Building #7107, 8888 University Dr., Burnaby, B.C., V5A1S6, Canada**  
Amy H. Lee

**Department of Experimental Medicine, University of British Columbia, 2775 Laurel Street, 10th Floor, Room 10117, Vancouver, BC V5Z 1M9, Canada.**  
Byron Brook, Freddy Francis, Danny J. Harbeson, Daniel He, Aaron Liu

**Department of Health Science and Technology, Aalborg University, Selma Lagerløfs Vej 249, 9260 Gistrup, Denmark.**  
Tue B. Bennike

**Department of Pathology, Boston Children's Hospital, BCH 3108, 300 Longwood Ave., Boston, MA 02115, USA**  
Tue B. Bennike, Benoit Fatou, Hanno Steen

**Research Center for Vitamins and Vaccines (CVIVA), Statens Serum Institut (SSI), Artillerivej 5, 2300 Copenhagen S, Denmark.**

Morten Bjerregaard-Andersen, Christian N. Golding, Kristina Lindberg Larsen, Frederik Schaltz-Buchholzer

**Department of Endocrinology, Odense University Hospital, Klørvænget 6, 5000 Odense C, Denmark.**

Morten Bjerregaard-Andersen

**Bandim Health Project, Indepth Network, Apartado 861, 1004 Bissau, Guinea-Bissau.**

Morten Bjerregaard-Andersen, Christian N. Golding, Kristina Lindberg Larsen, Lilica Sanca & Frederik Schaltz-Buchholzer

**Department of Medical Genetics, University of British Columbia, C201 - 4500 Oak Street, Vancouver, BC V6H 3N1 Canada**

Ryan R. Brinkman

**Graduate Program in Bioinformatics, BCCA, 100-570 West 7th Avenue, Vancouver, BC V5Z 4S6, Canada.**

Samuel H. Hinshaw

**Channing Laboratory, Brigham and Women's Hospital, 181 Longwood Ave., Boston, MA 02115, USA**

Jessica Lasky-Su

**Academic Department of Pediatrics (DPUO), Research Unit of perinatal infections, Bambino Gesù Childrens' Hospital, IRCCS, Piazza S. Onofrio, 4, Rome, Italy**

Elena Morrocchi & Paolo Palma

**Department of Pathology, Anatomy and Cell Biology, Thomas Jefferson University, Jefferson Alumni Hall, 1020 Locust Street, Suite 279, Philadelphia, PA 19107, USA.**

Matthew A. Pettengill

**OPEN, Institute of Clinical Research and Danish Institute for Advanced Science, University of Southern Denmark, and Odense University Hospital, J.B. Winsløvs Vej, 5000 Odense C, Denmark.**

Frederik Schaltz-Buchholzer

**Department of Pathology and Laboratory Medicine, Faculty of Medicine, University of British Columbia, Rm. G227–2211 Wesbrook Mall, Vancouver, BC V6T 2B5, Canada.**

Amrit Singh

Supplementary Table 1 – Flow cytometry panel markers

| <b>INNATE FLOW CYTOMETRY PANEL</b>                  |                             |
|-----------------------------------------------------|-----------------------------|
| <b>TARGET</b>                                       | <b>FLUOROCHROME</b>         |
| CD64                                                | Alexa 700                   |
| CD11c                                               | APC                         |
| CD123                                               | PE-Cy7                      |
| CD3                                                 | PE-CF594                    |
| gd TCR                                              | PE                          |
| CD56                                                | BV650                       |
| CD11b                                               | BV786                       |
| CD16                                                | FITC                        |
| CD45                                                | V450                        |
| <b>ADAPTIVE FLOW CYTOMETRY PANEL</b>                |                             |
| <b>TARGET</b>                                       | <b>FLUOROCHROME</b>         |
| CD10                                                | Alexa 700                   |
| CD19                                                | APC                         |
| CD27                                                | PE-Cy7                      |
| CD38                                                | PE-Cy5                      |
| IgD                                                 | PE-CF594                    |
| CD34                                                | PE                          |
| IgM                                                 | FITC                        |
| CD20                                                | BV786                       |
| CD138                                               | V450                        |
| <b>COMMON MARKERS IN INNATE AND ADAPTIVE PANELS</b> |                             |
| <b>TARGET</b>                                       | <b>FLUOROCHROME</b>         |
| FVD                                                 | APC-eFluor780               |
| CD66                                                | Biotin/ BV711 Streptavidine |
| CD14                                                | V500                        |
| HLADR                                               | eFluor605                   |
