# Supplementary material for: DNA Methylation signatures underpinning blood neutrophil to lymphocyte ratio during first week of human life
Source: PubMed Central journal article supplement — Nat Commun. 2024 Sep 17;15:8167. doi: 10.1038/s41467-024-52283-9 (PMC11408723; doi:10.1038/s41467-024-52283-9), 2024-09-17
Supplement: 41467_2024_52283_MOESM3_ESM.pdf [file 41467_2024_52283_MOESM3_ESM.pdf]

## **Description of Additional Supplementary Files**

File Name: Supplementary Data 1

Description: Differentially methylated and expressed genes associated with Day of Life.

File Name: Supplementary Data 2

Description: Complete list of enriched reactome pathways in protein-protein interaction network

File Name: Supplementary Data 3

Description: Causal mediation analysis statistics

File Name: Supplementary Data 4

Description: All independent significant SNPs associated with NLR at  $r^2$  0.6

File Name: Supplementary Data 5

Description: Results of ANNOVAR mapping between SNP associations and hg19 genomic features

File Name: Supplementary Data 6

Description: Summary of QC procedures
